## **Prediction of the Human Pharmacokinetics of 30 Modern Antibiotics Using the ANDROMEDA Software**

Urban Fagerholm<sup>a,\*</sup>, Sven Hellberg<sup>a</sup>, Jonathan Alvarsson<sup>b</sup> and Ola Spjuth<sup>a,b</sup>

<sup>a</sup>Prosilico AB, Lännavägen 7, SE-141 45 Huddinge, Sweden.

<sup>b</sup>Department of Pharmaceutical Biosciences and Science for Life Laboratory, Uppsala University, Box 591, SE-751 24 Uppsala, Sweden.

\*Corresponding author: [urban.fagerholm@prosilico.com](mailto:urban.fagerholm@prosilico.com)

### **ABSTRACT**

The ANDROMEDA software, based on machine learning, conformal prediction and a new physiologically-based pharmacokinetic model, was used to predict and characterize the human clinical pharmacokinetics of 30 selected modern small antibiotic compounds (investigational and marketed drugs). A majority of clinical pharmacokinetic data was missing. ANDROMEDA successfully filled this gap. Most antibiotics were predicted and measured to have limited permeability, good metabolic stability and multiple elimination pathways. According to predictions, most of the antibiotics are mainly eliminated renally and biliary and every other antibiotic is mainly eliminated via the renal route. Mean prediction errors for steady state volume of distribution, unbound fraction in plasma, renal and total clearance, oral clearance, fraction absorbed, fraction excreted renally, oral bioavailability and half-life were 1.3- to 2.3-fold. The overall median and maximum prediction errors were 1.5- and 4.8-fold, respectively, and 92 % of predictions had <3-fold error. Results are consistent with those obtained in previous validation studies and are better than with the best laboratory-based prediction methods, which validates ANDROMEDA for predictions of human clinical pharmacokinetics of modern antibiotic drugs, which to a great extent demonstrate pharmacokinetic characteristics challenging for laboratory methods (metabolic stability, limited permeability, efflux and multiple elimination pathways). Advantages with ANDROMEDA include that results are produced without the use of animals and cells and that predictions and decision-making can be done already at the design stage.

## Introduction

Antibiotic resistance is a serious emerging global health threat. Thus, there is a great demand to search for new effective and safe antibiotics.

Effective and safe dosing of new antibiotic drug candidates in humans requires that their pharmacokinetics (PK) is well predicted and defined. Prediction of PK for this class of compounds has generally been challenging, since many of them have limited passive permeability ( $P_e$ ) (with or without active uptake and efflux), are excreted to a significant extent via urine and bile and and/or are given at high dose levels (saturation PK).

Examples of antibiotics with limited  $P_e$  are amikacin, aztreonam, cefazolin, cefodizime, ceftriaxone, colistin, gentamicin, imipenem, kanamycin, neomycin and streptomycin, which all have maximum 5 % fraction absorbed ( $f_a$ ) and bioavailability (F) following oral dosing. Other antibiotics with limited passive  $P_e$ , but that also utilize active intestinal uptake transport (via PEPT1), include  $\beta$ -lactam antibiotics ampicillin, cefexime and cefadroxil (their passive  $P_e$  correspond to  $<20\%$   $f_a$ , while their actual  $f_a$  is  $>50\%$ ). Significant renal excretion occurs for, for example, fosfomycin, cefuroxime, cephradine, cefadroxil, cefcanel and cephalexin, which all have a fraction excreted in urine ( $f_{e,renal}$ ) of 90-100 % following intravenous dosing. Cefoperazone, ceftriaxone, erythromycin, mezlocillin and piperacillin are among antibiotics that have a fraction excreted in bile ( $f_{e,bile}$ ) of at least 20 % following intravenous dosing. The highly lipophilic clofazimine and bedaquiline (both used to treat tuberculosis) bind extensively to fat tissue and plasma proteins and have a half-life ( $t_{1/2}$ ) of several months.

Poor  $f_a$  and F prevent some antibiotic drugs to be suitable for oral dosing, and poor uptake and significant elimination via urine and feces means that a high fraction of dose (and sometimes also comparably large amount) is transported out into the environment. Thus, an ambition to enhance the oral uptake and reduce the fractional excretion of antibiotics is beneficial for the environment. Another implication of poor oral absorption and major excretion via kidneys and bile is limited applicability of *in vitro* PK screening systems such as Caco-2 (uncertain  $f_a$ - and F-predictions) and hepatocytes (metabolism rate below the limit of quantification). This was shown for ciprofloxacin (considerable underprediction of  $f_a$  from Caco-2  $P_e$ ) and piperacillin (metabolic stability not possible to quantify with human microsomes) (Fagerholm and Lundqvist, unpublished data).

ANDROMEDA by Prosilico is a multi-validated integrated *in silico*-based prediction software for human clinical PK.<sup>1-4</sup> It is based on conformal prediction (CP), which is a methodology that sits on top of machine learning methods and produce valid levels of confidence,<sup>5</sup> and a novel physiologically-based pharmacokinetic (PBPK) model.<sup>1</sup> See Alvarsson et al. (2021) for a more extensive introduction to CP.<sup>6</sup> The software has been applied for prediction of human clinical PK, including fraction absorbed

$f_a$ ,  $F$ ,  $t_{1/2}$ , *in vivo* dissolution potential, unbound fraction in plasma ( $f_u$ ), intrinsic metabolic clearance ( $CL_{int}$ ),  $CL$ , oral  $CL$  ( $CL/F$ ), steady-state volume of distribution ( $V_{ss}$ ),  $f_{e,renal}$  and  $f_{e,bile}$ .<sup>2-4</sup> In a major benchmarking study it outperformed laboratory methods in predictive accuracy and range.<sup>3</sup> ANDROMEDA predictions have also been approved by the German authority BfArM for use and main preclinical PK-source in clinical trial applications.

In 2017, 48 new antibiotic compounds with the potential to treat serious bacterial infections were in clinical development.<sup>7</sup> In an article by Al-Tawfiq et al., 20 antibiotics in the pipeline (phase III) or new on the market 2017-2020 were reviewed.<sup>8</sup> Compounds from these selections opened up for the opportunity to further validate ANDROMEDA and to characterize the PK of modern antibiotic compounds. The main aim of this study was to validate ANDROMEDA for prediction and characterization of the human clinical PK (with main focus on elimination routes) of modern antibiotics.

## Methods

### *ANDROMEDA PK-Prediction Software*

For a description of ANDROMEDA (including underlying CP models, algorithms, molecular descriptors, parameters and performance) see Fagerholm et al. 2022 and 2023.<sup>1-4</sup> The software predicts 30 human PK-parameters, including  $V_{ss}$ ,  $f_u$ ,  $CL$ ,  $CL_{int}$ ,  $f_{e,renal}$ ,  $f_{e,bile}$  (considering enterohepatic circulation),  $f_a$ ,  $F$ ,  $t_{1/2}$  and CYP substrate (2C9, 2D6 and 3A4) and efflux transporter (MDR-1, BCRP and MRP2) specificity.

ANDROMEDA is mainly applicable for compounds with MW 100 to 700 g/mol and for non-saturated conditions (not a high doses). There are groups of compounds for which the *in silico* models do not work, including metals and quaternary amines, and have limited use, for example, hydrolysis sensitive compounds and drugs binding covalently and/or to DNA.

None of the new antibiotics selected for the study was included in the training sets of the used CP models. Thus, every prediction was a forward-looking prediction where each compound was unknown to the models.

Where possible for marketed antibiotics, prediction accuracy/errors were estimated as predicted/observed or observed/predicted values (ratios  $\geq 1$  were selected). For investigational drugs, only qualitative (yes/no) data for renal and biliary excretion are presented.

### ***Compound Selection and Clinical PK-Data***

30 small investigational antibiotics (n=18) and antibiotics marketed 2017-2020 (n=12) were explored and selected for the investigation (Table 1). The minimum, median, mean and maximum molecular weights for this selection were 277, 405, 461 and 937 g/mol, respectively. Antibiotics belonged to various classes: Fluoroquinolones,  $\beta$ -lactams,  $\beta$ -lactamase inhibitors, aminoglycosides, tetracyclines, pleuromutilins, cephalosporins, nitroimidazooxazines, DHFR inhibitors, 4th generation macrolides, triazaacenaphthylenes, spiropyrimidinetriones and oxazolidinones. PK-data of marketed antibiotics were taken from FDA-label documents (Clinical Pharmacology sections).

### **Results and Discussion**

The amount of clinical PK-data for the antibiotics was limited –  $V_{ss}$  (n=10; range 0.3-4.6 L/kg; median 0.3 L/kg),  $f_u$  (n=10; 0.05-0.98; median 0.55),  $f_a$  (n=0),  $F$  (n=4; 0.25-0.59),  $CL$  (n=6; 75-235 mL/min),  $CL_R$  (n=6; 24-148 mL/min),  $CL/F$  (n=3; 343-793 mL/min),  $t_{1/2}$  (n=14; 0.9-20 h; median 3.6 h),  $f_{e,bile}$  (n=0; rough estimates were found for 3 antibiotics),  $f_{e,renal}$  (n=11; range 0.12-0.98; median 0.57).

For modern antibiotics in general,  $V_{ss}$ ,  $CL_{int}$  and  $t_{1/2}$  are low/short and  $f_u$ ,  $f_{e,renal}$  and  $f_{e,bile}$  high compared to other types of modern and traditional drugs.<sup>3</sup> For 4 antibiotics, the  $t_{1/2}$  was less than 2 h. Rapid elimination from the body implies needs to administer at higher doses, with shorter time intervals and/or as continuous infusion.

ANDROMEDA was capable of predicting the human clinical PK for all the antibiotics. Prediction results are shown in Table 1. Median prediction errors for  $V_{ss}$ ,  $f_u$ ,  $CL$ ,  $CL_R$ ,  $CL/F$ ,  $F$ ,  $f_{e,renal}$  and  $t_{1/2}$  were 1.4-, 1.2-, 1.4-, 1.9-, 2.3-, 1.2-, 1.5- (9 % absolute error) and 2.0-fold, respectively. Corresponding mean errors were 1.8-, 1.3-, 1.6-, 2.0-, 2.4-, 1.2-, 1.7- (18 % absolute error) and 2.2-fold, respectively. Maximum errors were 4.7-, 1.8-, 2.5-, 2.7-, 2.5-, 1.6-, 2.9- (47 % absolute error) and 4.8-fold, respectively.

For eravacycline, lefamulin and cefiderocol, a minor fraction (up to 17 %) unchanged substance was found in faeces following intravenous dosing. This was consistent with up to 7 % predicted  $f_{e,bile}$  for these antibiotics.

The results for  $CL$  and  $CL/F$  indicate that the dose and exposure of antibiotic candidate drugs can be well predicted using the software (with on average ca 2-fold prediction error).

Overall prediction errors (median 1.5-fold, mean 1.8-fold, max 4.8-fold, 71 % with <2-fold error; 92 % with <3-fold error; n=63) are in line with previous results, which further validates ANDROMEDA. The results are equally good as or better than those obtained with best of comparable laboratory methods.<sup>3,9,10</sup>

According to predictions for antibiotics, most of them are mainly ( $\geq 50\%$ ) eliminated renally and biliary, 47 % are mainly ( $\geq 50\%$ ) eliminated via the renal route, 97 % are excreted renally, 83 % are excreted via bile (in an internal validation the model for bile excretion gave correct binary predictions in 97 % of cases), 93 % have low/moderate passive  $P_e$  (only one has very high passive  $P_e$ ), 43 % are effluxed by MDR-1, BCRP and/or MRP2, 20 % have limited gastrointestinal dissolution potential, 70-83 % have a  $CL_{int}$  that is normally problematic to quantify with human hepatocytes (approximately  $<500-1000$  mL/min) and 60 % are not metabolised by CYPs 2C9, 2D6 and/or 3A4 (Figure 1).

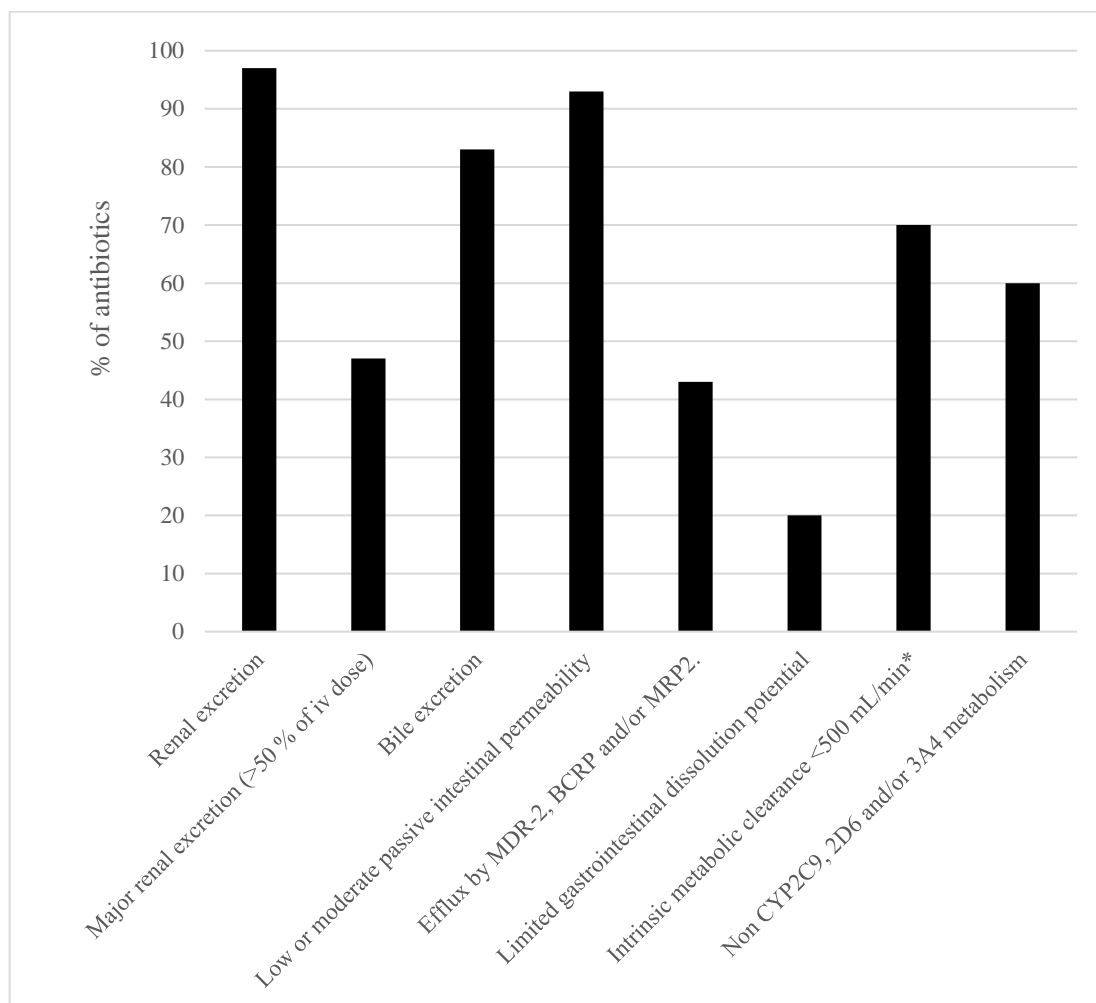

**Figure 1** The percentage of modern antibiotics with certain predicted pharmacokinetics characteristics. \*below the general limit of quantification for the conventional human hepatocyte assay.

Significant renal and biliary clearance and limited metabolic rate (often out of reach for the conventional hepatocyte assay) and  $P_e$  (challenging for Caco-2) demonstrates the requirement of methods to predict these properties for antibiotics *in vivo* in man. ANDROMEDA has this capacity (our *in silico* methodology also enables prediction of  $f_a$  for actively absorbed compounds<sup>3</sup>). It also shows a general trend that antibiotics to a major extent leaves the body in unchanged form out into the

environment. Only one of the antibiotics does not undergo elimination via kidneys and bile (according to predictions).

In conclusion, the results are consistent with those obtained in previous validation studies and validates ANDROMEDA for predictions of human clinical PK of modern antibiotic drugs, which to a great extent demonstrate PK-characteristics challenging for laboratory methods (metabolic stability, limited  $P_e$ , efflux and multiple elimination pathways). Advantages with ANDROMEDA include that PK-results are produced without the use of animals and cells and that predictions and decision-making can be done already at the design stage.

## References

1. Fagerholm U, Hellberg S, Spjuth O. Advances in predictions of oral bioavailability of candidate drugs in man with new machine learning methodology. *Molecules* 2021;26:2572.
2. Fagerholm U, Hellberg S, Alvarsson J, Spjuth O. *In silico* prediction of volume of distribution of drugs in man using conformal prediction performs on par with animal data-based models. *Xenobiot.* 2021;51(12):1366-1371.
3. Fagerholm U, Hellberg S, Alvarsson J, Spjuth O. *In silico* prediction of human clinical pharmacokinetics with ANDROMEDA by Prosilico: Predictions for an established benchmarking data set, a modern small drug data set, and a comparison with laboratory methods. *Altern Lab Anim.* 2023;51:39-54.
4. Fagerholm U, Hellberg S, Alvarsson J, Spjuth O. Using the ANDROMEDA by Prosilico software for prediction of the human pharmacokinetics of 4 compounds of natural origin - Colistin, curcumin, UCN-01 and voclosporin. *bioRxiv*, Aug. 2022.
5. Vovk V, Gammernan A, Shafer G. *Algorithmic learning in a random world*. Springer Science & Business Media, 2005.
6. Alvarsson J, Arvidsson McShane S, Norinder U, Spjuth O. Predicting with confidence: using conformal prediction in drug discovery. *J Pharm Sci.* 2021;110:42-49.
7. [pewtrusts.org/antibiotic-pipeline](https://www.pewtrusts.org/antibiotic-pipeline). Antibiotics Currently in Global Clinical Development. 2018.
8. Al-Tawfiq JA, Momattin H, Al-Alis AY, Eljaaly K, Tirupathi, R, Bilal Haradwala M, Areti S, Alhumaid S, Rabaan AA, Al Mutair A, Schalgenghauf P. Antibiotics in the pipeline: a literature review (2017-2020). *Infection* 2022;50:553-564.
9. Miljković F, Martinsson A, Obrezanova O, Williamson B, Johnson M, Sykes A. Machine learning models for human *in vivo* pharmacokinetic parameters with in-house validation. *Mol Pharmaceut.* November 10, 2021.
10. Poulin P, Jones RDO, Jones HM, Gibson CT, Rowland M, Chien JY, Ring BJ, Adkinson KK, Ku S, Vuppugalla R, Marathe P, Fischer O, Dutta S, Sinha VK, Björnsson T, Lavé T, Yates JW. PHRMA CPCDC initiative on predictive models of human pharmacokinetics, Part 5: Prediction of plasma concentration–time profiles in human by using the physiologically-based pharmacokinetic modeling approach. *J Pharm Sci.* 2011;100:4127-4157.

**Table 1** 30 small investigational antibiotics and antibiotics marketed 2017-2020 and their observed and predicted human clinical pharmacokinetics.

|                   | Antibiotic      | MW         | Adm. route | T½ [h] |      |       | F [%] |      |       | fe [%] |      |       | Vss [L/kg] |      |       |   |  |
|-------------------|-----------------|------------|------------|--------|------|-------|-------|------|-------|--------|------|-------|------------|------|-------|---|--|
|                   |                 |            |            | Obs    | Pred | Error | Obs   | Pred | Error | Obs    | Pred | Error | Obs        | Pred | Error |   |  |
| Marketed          | Cefiderocol     | 752        | iv         | 2,8    | 1,4  | 2,00  | -     | -    | -     | 91     | 95   | 1,04  | 0,26       | 0,19 | 1,35  |   |  |
|                   | Delafoxacin     | 441        | iv po      | 3,7    | 1,7  | 2,18  | 59    | 36   | 1,64  | 40     | 14   | 2,86  | 0,41       | 0,42 | 1,02  |   |  |
|                   | Eravacycline    | 559        | iv         | 20     | 16,5 | 1,21  | -     | -    | -     | 20     | 43   | 2,15  | 4,59       | 0,98 | 4,68  |   |  |
|                   | Finafloxacin    | 399        |            | 1-10   | 5,9  | 1,07  | -     | -    | -     | 30     | 77   | 2,57  | 1,55       | 1,12 | 1,38  |   |  |
|                   | Lascufloxacin   | 439        |            | -      | -    | -     | -     | -    | -     | -      | >0   | -     | -          | -    | -     |   |  |
|                   | Lefamulin       | 508        | iv po      | 8      | 9,6  | 1,20  | 25    | 34   | 1,36  | 12     | 8    | 1,50  | 1,23       | 1,10 | 1,12  |   |  |
|                   | Meropenem       | 383        | iv         | 1,22   | 1,5  | 1,23  | -     | -    | -     | 60     | 52   | 1,15  | 0,29       | 0,29 | 1,00  |   |  |
|                   | Omadacycline    | 557        | iv po      | 16     | 4,7  | 3,40  | 35    | 35   | 1,00  | 27     | 18   | 1,50  | 3,66       | 2,1  | 1,74  |   |  |
|                   | Plazomicin      | 593        | iv         | 3,5    | 1,5  | 2,33  | -     | -    | -     | 98     | 92   | 1,06  | 0,26       | 0,17 | 1,50  |   |  |
|                   | Pretomanid      | 359        | po         | 16,9   | 33   | 1,95  | -     | -    | -     | -      | >0   | -     | -          | -    | -     |   |  |
|                   | Relebactam      | 348        | iv         | 1,2    | 5,8  | 4,83  | -     | -    | -     | >90    | 67   | 1,42  | 0,27       | 0,97 | 3,57  |   |  |
|                   | Vaborbactam     | 297        | iv         | 1,68   | 1,5  | 1,12  | -     | -    | -     | 75     | 39   | 1,92  | 0,27       | 0,26 | 1,02  |   |  |
|                   | Investigational | Afabicin   | 485        |        | -    | -     | -     | -    | -     | -      | -    | >0    | -          | -    | -     | - |  |
|                   |                 | Brilacidin | 937        |        | -    | -     | -     | -    | -     | -      | -    | >0    | -          | -    | -     | - |  |
|                   |                 | Cadazolid  | 586        |        | -    | -     | -     | -    | -     | -      | -    | >0    | -          | -    | -     | - |  |
| Ceftobiprole      |                 | 535        | iv         | -      | -    | -     | -     | -    | -     | Main   | >0   | -     | -          | -    | -     |   |  |
| Contezolid        |                 | 408        |            | -      | -    | -     | -     | -    | -     | -      | >0   | -     | -          | -    | -     |   |  |
| Delpazolid        |                 | 308        |            | -      | -    | -     | -     | -    | -     | -      | >0   | -     | -          | -    | -     |   |  |
| Diazabicycloctane |                 | 277        |            | -      | -    | -     | -     | -    | -     | -      | >0   | -     | -          | -    | -     |   |  |
| Enmetazobactam    |                 | 314        | iv         | -      | -    | -     | -     | -    | -     | -      | >0   | -     | -          | -    | -     |   |  |
| Gepotidacin       |                 | 448        |            | -      | -    | -     | -     | -    | -     | -      | >0   | -     | -          | -    | -     |   |  |
| Iclaprim          |                 | 354        | iv         | -      | -    | -     | -     | -    | -     | -      | >0   | -     | -          | -    | -     |   |  |
| Nacubactam        |                 | 324        |            | -      | -    | -     | -     | -    | -     | -      | >0   | -     | -          | -    | -     |   |  |
| Nemonoxacin       |                 | 371        |            | -      | -    | -     | -     | -    | -     | -      | >0   | -     | -          | -    | -     |   |  |
| Ridinilazole      |                 | 388        | po         | -      | -    | -     | -     | -    | -     | -      | 0    | -     | -          | -    | -     |   |  |
| Solithromycin     |                 | 845        | iv po      | 3-5    | 1,2  | 3,33  | -     | -    | -     | -      | >0   | -     | -          | -    | -     |   |  |
| Sulopenem         |                 | 349        | po         | 0,9    | 2,2  | 2,44  | 34    | 34   | 1,00  | -      | >0   | -     | -          | -    | -     |   |  |
| Taniborbactam     |                 | 389        | iv         | -      | -    | -     | -     | -    | -     | -      | >0   | -     | -          | -    | -     |   |  |
| Zabofloxacin      |                 | 401        |            | -      | -    | -     | -     | -    | -     | -      | >0   | -     | -          | -    | -     |   |  |
| Zoliflodacin      |                 | 487        | po         | 5,8    | 11,3 | 1,95  | -     | -    | -     | -      | >0   | -     | -          | -    | -     |   |  |
|                   |                 |            |            | Mean   | 2,16 |       |       | 1,25 |       |        | 1,72 |       |            | 1,84 |       |   |  |
|                   |                 |            |            | Median | 1,98 |       |       | 1,18 |       |        | 1,50 |       |            | 1,37 |       |   |  |

|                   | Antibiotic      | CL [mL/min] |      |        | CLR [mL/min] |      |       | CL/F [mL/min] |      |       | fu [%] |      |       | fe,bile [%] |      |       | Passive Pe |   |
|-------------------|-----------------|-------------|------|--------|--------------|------|-------|---------------|------|-------|--------|------|-------|-------------|------|-------|------------|---|
|                   |                 | Obs         | Pred | Error  | Obs          | Pred | Error | Obs           | Pred | Error | Obs    | Pred | Error | Obs         | Pred | Minor | Pred       |   |
| Marketed          | Cefiderocol     | -           | -    | -      | -            | -    | -     | -             | -    | -     | 0,43   | 0,3  | 1,43  | -           | 1    | -     | Low        |   |
|                   | Delafoxacin     | 235         | 265  | 1,13   | 98           | 36   | 2,73  | 343           | 732  | 2,13  | 0,16   | 0,29 | 1,81  | -           | 5    | -     | Mod        |   |
|                   | Eravacycline    | -           | -    | -      | -            | -    | -     | -             | -    | -     | 0,15   | 0,22 | 1,47  | 17          | 2    | -     | Mod        |   |
|                   | Finafloxacin    | -           | -    | -      | -            | -    | -     | -             | -    | -     | -      | -    | -     | -           | 1    | -     | Mod        |   |
|                   | Lascufloxacin   | -           | -    | -      | -            | -    | -     | -             | -    | -     | -      | -    | -     | -           | 1    | -     | Mod        |   |
|                   | Lefamulin       | 198         | 115  | 1,72   | 24           | 9    | 2,64  | 793           | 337  | 2,35  | 0,052  | 0,05 | 1,04  | 7           | 7    | -     | Mod        |   |
|                   | Meropenem       | -           | -    | -      | -            | -    | -     | -             | -    | -     | 0,98   | 0,87 | 1,13  | -           | 2    | -     | Mod        |   |
|                   | Omadacycline    | 187         | 475  | 2,54   | 51           | 84   | 1,66  | 543           | 1346 | 2,48  | 0,8    | 0,67 | 1,19  | -           | 5    | -     | Mod        |   |
|                   | Plazomicin      | 75          | 122  | 1,63   | 73           | 112  | 1,53  | -             | -    | -     | 0,8    | 0,9  | 1,13  | -           | 1    | -     | Low        |   |
|                   | Pretomanid      | -           | -    | -      | -            | -    | -     | -             | -    | -     | 0,136  | 0,15 | 1,10  | -           | 0    | -     | Mod        |   |
|                   | Relebactam      | 145         | 175  | 1,21   | 131          | 117  | 1,12  | -             | -    | -     | 0,78   | 0,94 | 1,21  | -           | 1    | -     | Mod        |   |
|                   | Vaborbactam     | 205         | 184  | 1,11   | 148          | 72   | 2,06  | -             | -    | -     | 0,67   | 0,40 | 1,68  | -           | 2    | -     | Mod        |   |
|                   | Investigational | Afabicin    | -    | -      | -            | -    | -     | -             | -    | -     | -      | -    | -     | -           | -    | >0    | -          | - |
|                   |                 | Brilacidin  | -    | -      | -            | -    | -     | -             | -    | -     | -      | -    | -     | -           | -    | >0    | -          | - |
|                   |                 | Cadazolid   | -    | -      | -            | -    | -     | -             | -    | -     | -      | -    | -     | -           | -    | >0    | -          | - |
| Ceftobiprole      |                 | -           | -    | -      | -            | -    | -     | -             | -    | -     | -      | -    | -     | -           | >0   | -     | -          |   |
| Contezolid        |                 | -           | -    | -      | -            | -    | -     | -             | -    | -     | -      | -    | -     | -           | Ud   | -     | -          |   |
| Delpazolid        |                 | -           | -    | -      | -            | -    | -     | -             | -    | -     | -      | -    | -     | -           | 0    | -     | -          |   |
| Diazabicycloctane |                 | -           | -    | -      | -            | -    | -     | -             | -    | -     | -      | -    | -     | -           | >0   | -     | -          |   |
| Enmetazobactam    |                 | -           | -    | -      | -            | -    | -     | -             | -    | -     | -      | -    | -     | -           | >0   | -     | -          |   |
| Gepotidacin       |                 | -           | -    | -      | -            | -    | -     | -             | -    | -     | -      | -    | -     | -           | >0   | -     | -          |   |
| Iclaprim          |                 | -           | -    | -      | -            | -    | -     | -             | -    | -     | -      | -    | -     | -           | Ud   | -     | -          |   |
| Nacubactam        |                 | -           | -    | -      | -            | -    | -     | -             | -    | -     | -      | -    | -     | -           | >0   | -     | -          |   |
| Nemonoxacin       |                 | -           | -    | -      | -            | -    | -     | -             | -    | -     | -      | -    | -     | -           | >0   | -     | -          |   |
| Ridinilazole      |                 | -           | -    | -      | -            | -    | -     | -             | -    | -     | -      | -    | -     | -           | 0    | -     | -          |   |
| Solithromycin     |                 | -           | -    | -      | -            | -    | -     | -             | -    | -     | -      | -    | -     | -           | >0   | -     | -          |   |
| Sulopenem         |                 | -           | -    | -      | -            | -    | -     | -             | -    | -     | -      | -    | -     | -           | >0   | -     | -          |   |
| Taniborbactam     | -               | -           | -    | -      | -            | -    | -     | -             | -    | -     | -      | -    | -     | >0          | -    | -     |            |   |
| Zabofloxacin      | -               | -           | -    | -      | -            | -    | -     | -             | -    | -     | -      | -    | -     | >0          | -    | -     |            |   |
| Zoliflodacin      | -               | -           | -    | -      | -            | -    | -     | -             | -    | -     | -      | -    | -     | >0          | -    | -     |            |   |
|                   |                 |             |      | Mean   | 1,56         |      |       | 1,96          |      |       | 2,32   |      |       | 1,32        |      |       |            |   |
|                   |                 |             |      | Median | 1,42         |      |       | 1,86          |      |       | 2,35   |      |       | 1,20        |      |       |            |   |

Ud=undetermined
